# Supplementary material
Source: publisher site journal article supplement (https://www.dovepress.com/get_supplementary_file.php?f=407680.docx)
Supplement: Supplementary file 1 [file get_supplementary_file.php]

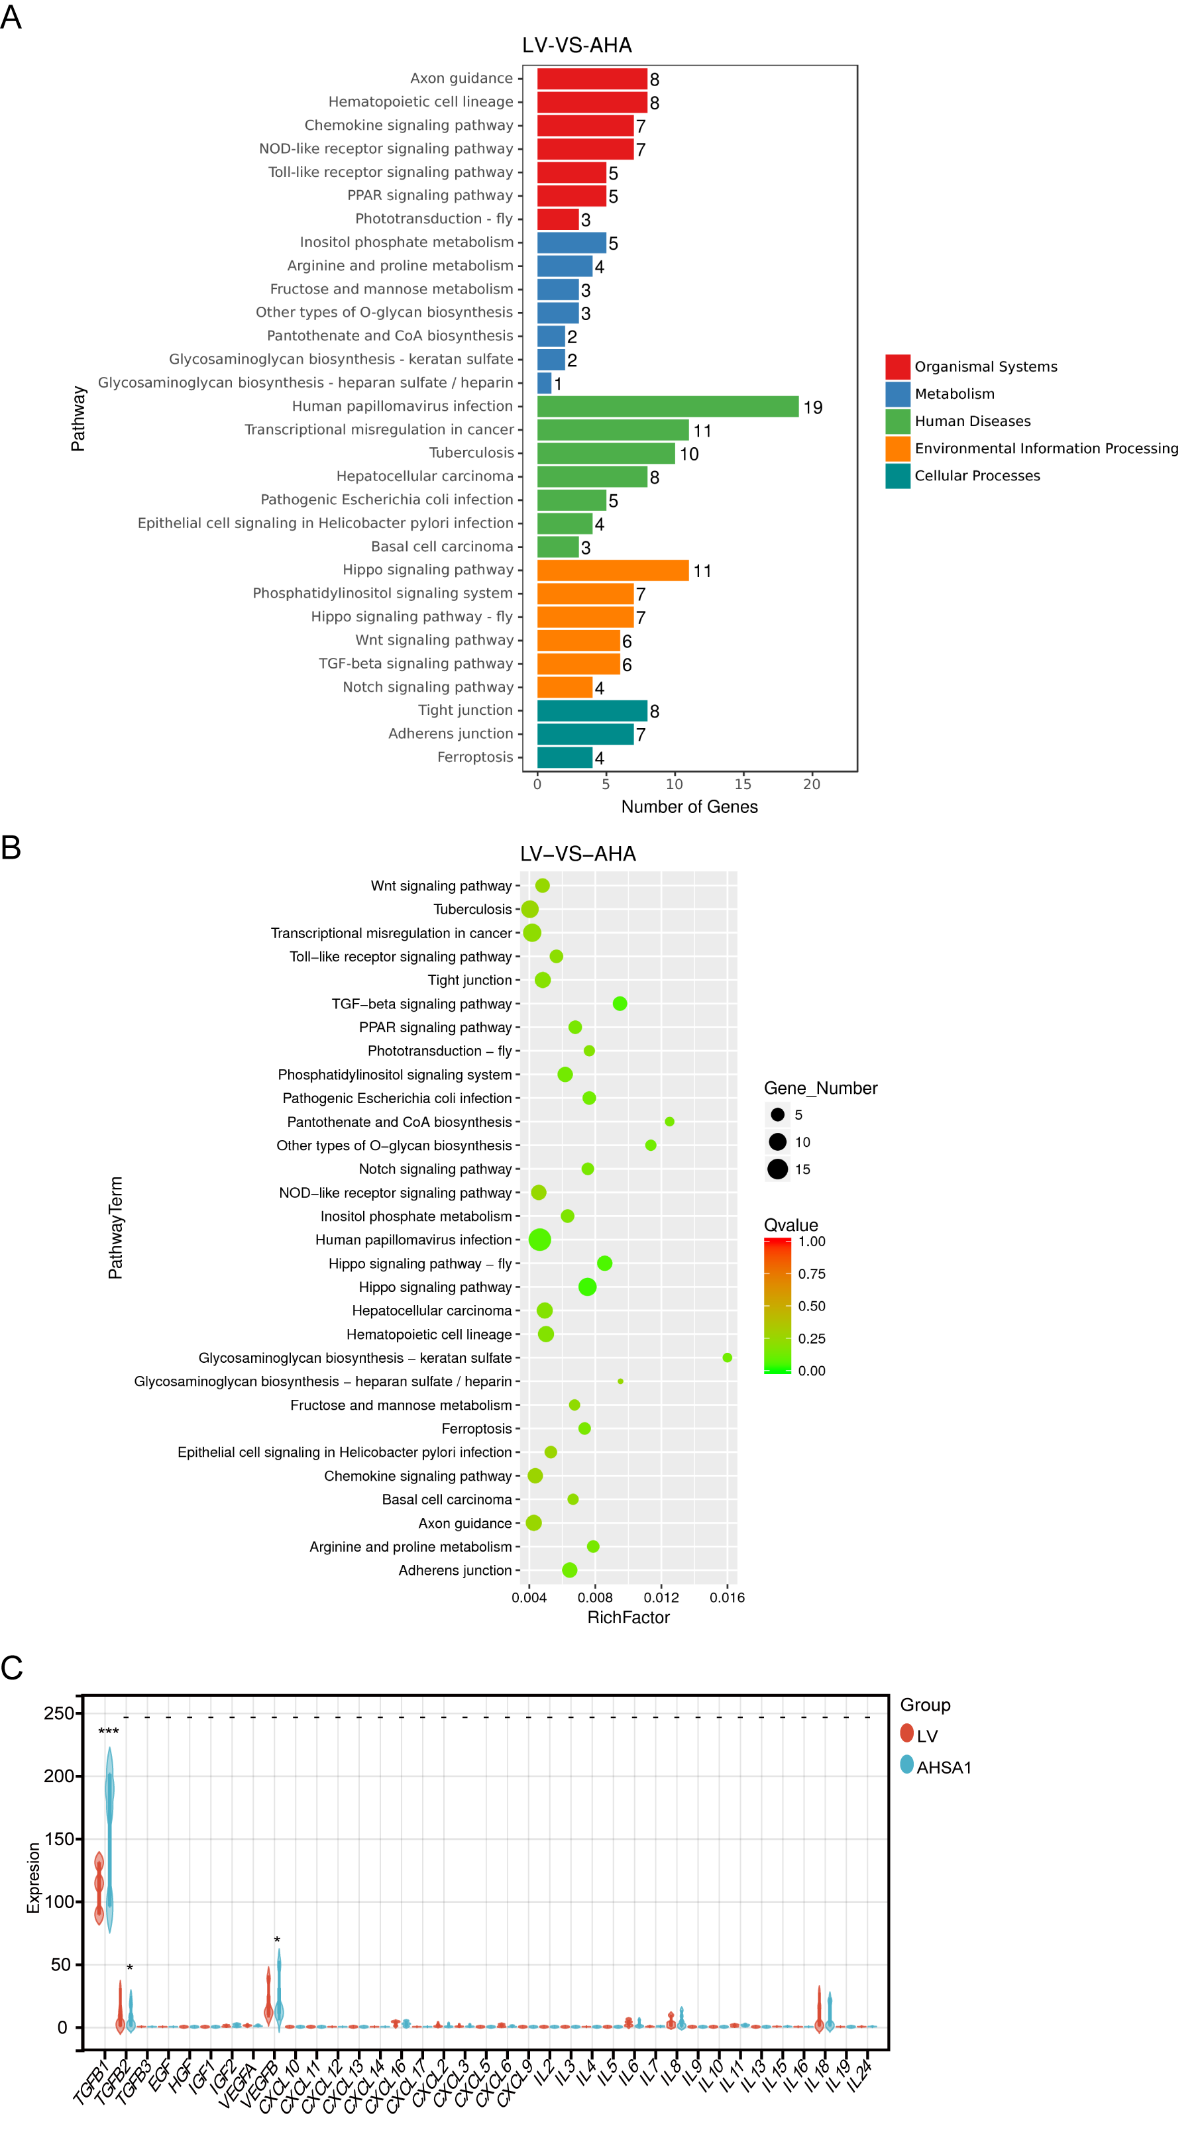


**Figure S1. Bioinformatics analysis of AHSA1-related signaling pathways based on RNA-seq.**

**(A and B)** RNA-Seqanalysis demonstrated that the TGF-β signaling pathway was involved in AHSA1 upregulation in SK-HEP1 cells, as detected by KEGG analysis.

**(C)** RNA-seq analysis of cytokines revealed that AHSA1 had a significant positive correlation with the expression of TGF-β1, TGF-β2, VEGF-β, and IL-8 in LIHC in the TCGA database. NS *P* > 0.05, **P* < 0.05.
